# Supplementary material for: Ontogenetic Changes in Auxin Biosynthesis and Distribution Determine the Organogenic Activity of the Shoot Apical Meristem in pin1 Mutants
Source: MDPI journal article supplement (doi:10.3390/ijms20010180), 2019-01-06
Supplement: s1 [file s1]

**Supplementary Figure S1.** Secondary growth in the inflorescence stems

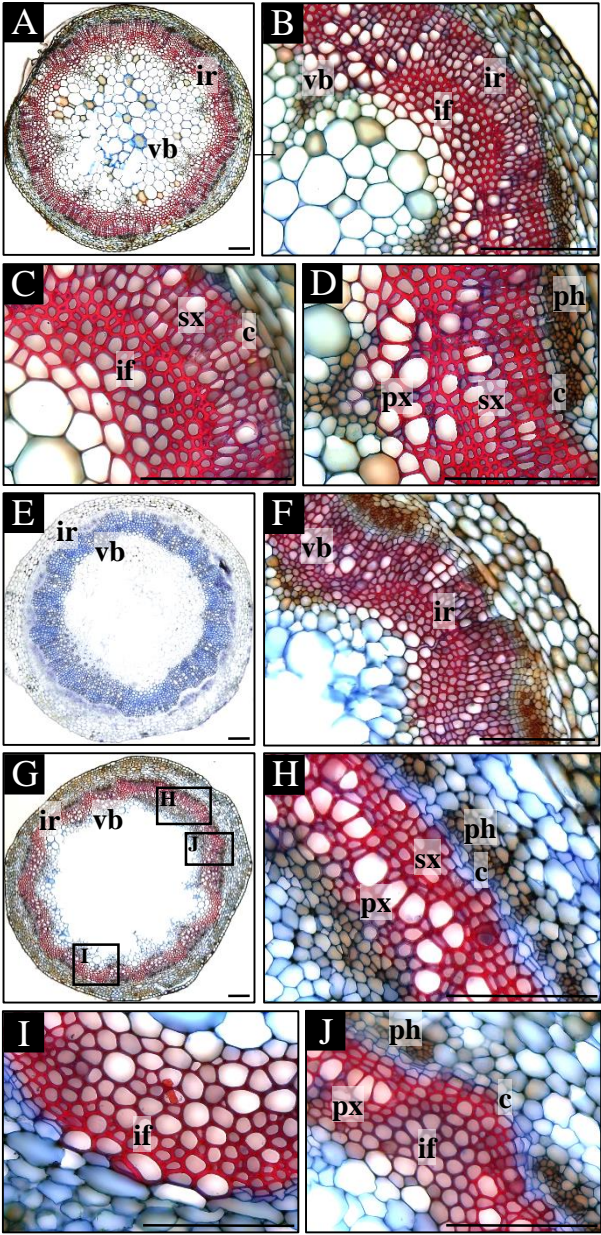

**Supplementary Figure S1.** Secondary growth in the inflorescence stems. Transversal sections through the basal region of the inflorescence stems of WT (A-D) and *pin1* mutant (E-J) plants. In WT plants the secondary vascular tissues form a continuous cylinder (A). Cambium is present in the interfascicular region (B,C) and in the vascular bundles (D). In *pin1* mutants the secondary vascular tissues form a continuous cylinder (E,F) or develop only locally (G) with cambium present in the bundles (H) and only sectorially in the interfascicular region (I,J). vb - vascular bundle, px - primary xylem, sx - secondary xylem, ph - phloem; if - interfascicular fibers, ir- interfascicular region, c - cambium. Scale bar 100μm.
