# Supplementary material for: Ontogenetic Changes in Auxin Biosynthesis and Distribution Determine the Organogenic Activity of the Shoot Apical Meristem in pin1 Mutants
Source: MDPI journal article supplement (doi:10.3390/ijms20010180), 2019-01-06
Supplement: s1 [file s1]

**Supplementary Figure S2.** Disorders in the collateral structure of the vascular bundles in the *pin1* mutant.

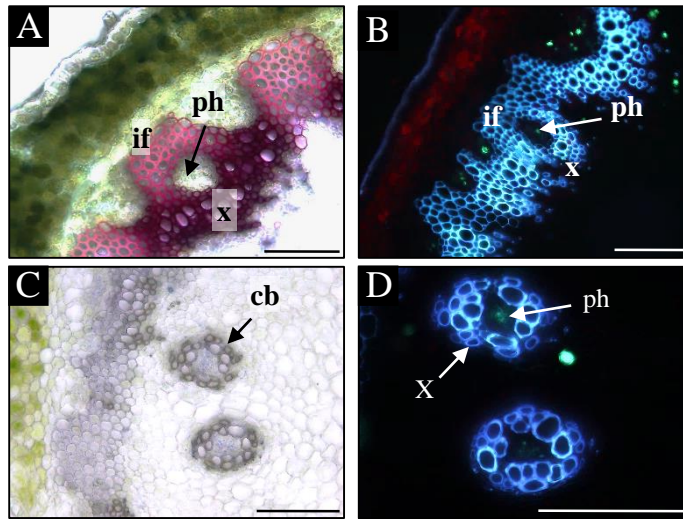

**Supplementary Figure S2.** Disorders in the collateral structure of the vascular bundles in the *pin1* mutant. Transversal sections through the inflorescence stems stained with floroglucinol (A) and alcian blue (B-D). The regions with phloem being surrounded by interfascicular fibers and xylem (A,B), or only by xylem (C,D). x - xylem, ph - phloem, if - interfascicular fibers, cb - concentric bundles. Scale bar 100µm
